# Supplementary material
Source: Frontiers journal article supplement (https://www.frontiersin.org/articles/400040)
Supplement: Data_Sheet_1.PDF [file Data_Sheet_1.PDF]

Supp. Fig.S1

A

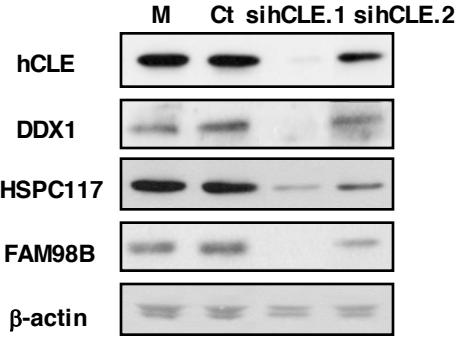

*\*From Pérez-Gonzalez et al, 2014*

B

| Treatment | Sample        | Luciferase RNA (arbitrary units) | Luc RNA/ Total RNA |
|-----------|---------------|----------------------------------|--------------------|
| DMSO      | si.Ct 1h      | 72.8                             | 9                  |
|           | si.Ct 2,30 h  | 77.7                             | 8                  |
|           | si.Ct 5h      | 73.4                             | 10.0               |
|           | si.CLE 1h     | 62.9                             | 10.5               |
|           | si.CLE 2,30 h | 77.7                             | 8.2                |
|           | si.CLE 5h     | 71.8                             | 11.2               |
| DRB       | si.Ct 1h      | 55.5                             | 7.0                |
|           | si.Ct 2,30 h  | 60.8                             | 6.5                |
|           | si.Ct 5h      | 59.7                             | 7.0                |
|           | si.CLE 1h     | 53.0                             | 7.9                |
|           | si.CLE 2,30 h | 49.0                             | 7.0                |
|           | si.CLE 5h     | 56.1                             | 7.8                |

**Supp. Fig. S1. Silencing of hCLE does not modify RNA stability. of an exogenous mRNA.** A). Silencing of hCLE with different lentiviral silencers (siCLE.1 and siCLE.2) causes a reduction in the levels of hCLE and its associated-proteins; DDX1, HSPC117 and Fam98B, compared to the mock cells (M) and control silencer treated cells (Ct) (From Perez-Gonzalez et. al. 2014). B). siCt and siCLE HEK293T cells were transfected with plasmid pCMV-Luc expressing luciferase (16 h) and DMSO- or DRB-treated. Aliquots collected at various times were fractionated to separate cytoplasm from nucleus. Total RNA quantity was measured by nano-drop and Luc mRNA amount was analyzed and measured by Northern blot analysis.
